# Supplementary material
Source: MDPI journal article supplement (https://www.mdpi.com/2073-4344/13/7/1066)
Supplement: s1 [file s1]

---

## Contents

|                                                                                                                                                                     |   |
|---------------------------------------------------------------------------------------------------------------------------------------------------------------------|---|
| 1. H <sub>2</sub> -TPR profiles: (a) Cu-MOR <sub>1</sub> ; (b) Cu-MOR <sub>1</sub> -water (SiO <sub>2</sub> /Al <sub>2</sub> O <sub>3</sub> = 15.5). .....          | 3 |
| 2. TEM images: (a) Cu-MOR <sub>1</sub> ; (b) Cu-MOR <sub>1</sub> -water (SiO <sub>2</sub> /Al <sub>2</sub> O <sub>3</sub> = 15.5). .....                            | 3 |
| 3. XPS spectra of Cu-MOR <sub>2</sub> and Cu-MOR <sub>2</sub> -water (SiO <sub>2</sub> /Al <sub>2</sub> O <sub>3</sub> = 8.73).....                                 | 4 |
| 4. In-situ FTIR spectra :(a) Cu-MOR <sub>2</sub> ; (b) Cu-MOR <sub>2</sub> -water (SiO <sub>2</sub> /Al <sub>2</sub> O <sub>3</sub> = 8.73). .....                  | 4 |
| 5. <i>In-situ</i> pyridine-IR spectra :(a) Cu-MOR <sub>1</sub> ; (b) Cu-MOR <sub>1</sub> -water (SiO <sub>2</sub> /Al <sub>2</sub> O <sub>3</sub> = 15.5).<br>..... | 4 |

1. H<sub>2</sub>-TPR profiles: (a) Cu-MOR<sub>1</sub>; (b) Cu-MOR<sub>1</sub>-water (SiO<sub>2</sub>/Al<sub>2</sub>O<sub>3</sub> = 15.5).

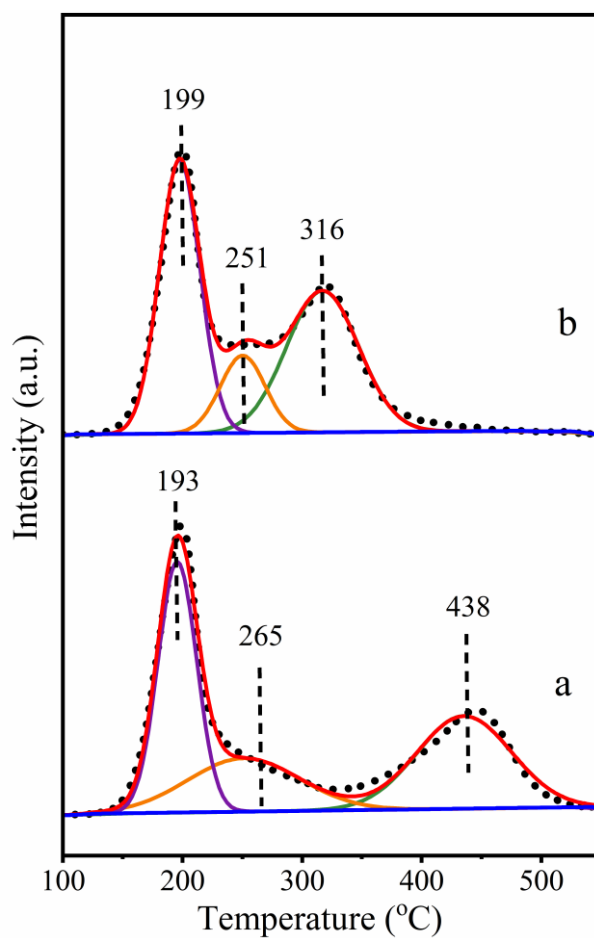

**Figure S1.** H<sub>2</sub>-TPR profiles: (a) Cu-MOR<sub>1</sub>; (b) Cu-MOR<sub>1</sub>-water.

2. TEM images: (a) Cu-MOR<sub>1</sub>; (b) Cu-MOR<sub>1</sub>-water (SiO<sub>2</sub>/Al<sub>2</sub>O<sub>3</sub> = 15.5).

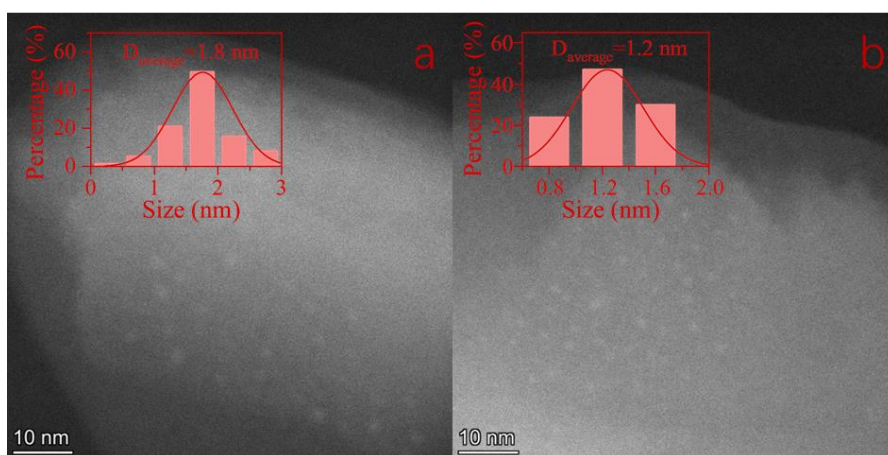

**Figure S2.** TEM images: (a) Cu-MOR<sub>1</sub>; (b) Cu-MOR<sub>1</sub>-water.

### 3. XPS spectra of Cu-MOR<sub>2</sub> and Cu-MOR<sub>2</sub>-water (SiO<sub>2</sub>/Al<sub>2</sub>O<sub>3</sub> = 8.73).

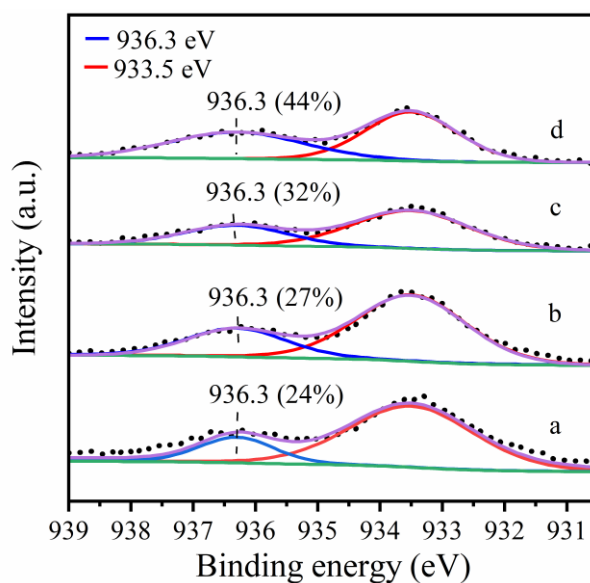

**Figure S3.** Cu<sub>2</sub>p<sub>3/2</sub> photoelectron spectra of (a) Cu-MOR<sub>2</sub>, (b) Cu-MOR<sub>2</sub>-water, (c) Cu-MOR<sub>2</sub> after calcined at 450 °C for 2 h, and (d) Cu-MOR<sub>2</sub>-water after calcined at 450 °C for 2 h.

### 4. In-situ FTIR spectra :(a) Cu-MOR<sub>2</sub>; (b) Cu-MOR<sub>2</sub>-water (SiO<sub>2</sub>/Al<sub>2</sub>O<sub>3</sub> = 8.73).

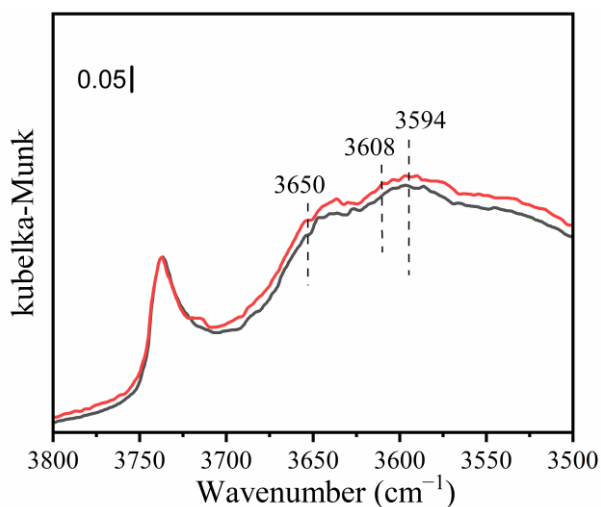

Figure S4. *In-situ* diffuse reflectance FTIR spectra: (a) Cu-MOR<sub>2</sub> after calcination at 450 °C; (b) Cu-MOR<sub>2</sub>-water after calcination at 450 °C.

### 5. In-situ pyridine-IR spectra :(a) Cu-MOR<sub>1</sub>; (b) Cu-MOR<sub>1</sub>-water (SiO<sub>2</sub>/Al<sub>2</sub>O<sub>3</sub> = 15.5).

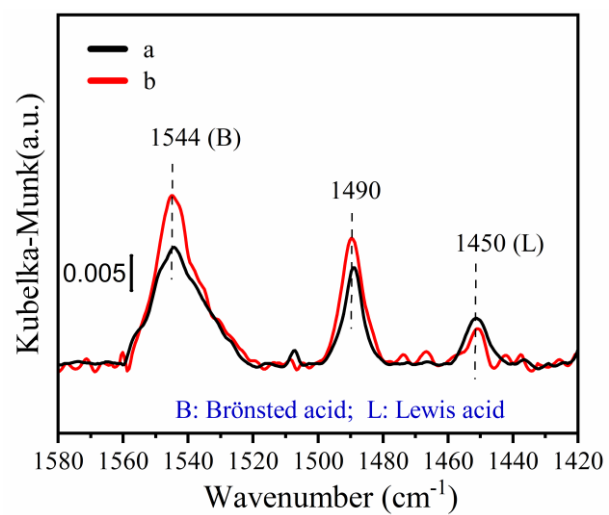

Figure S5. *In-situ* pyridine-IR spectra :(a) Cu-MOR<sub>1</sub>; (b) Cu-MOR<sub>1</sub>-water.
